# Supplementary figures and images for: The combinatorial atmospheric pressure chemical vapour deposition (cAPCVD) of a gradating N-doped mixed phase titania thin film
Source: Royal Society of Chemistry journal article supplement (doi:10.1039/b914117k), 2010-01-01

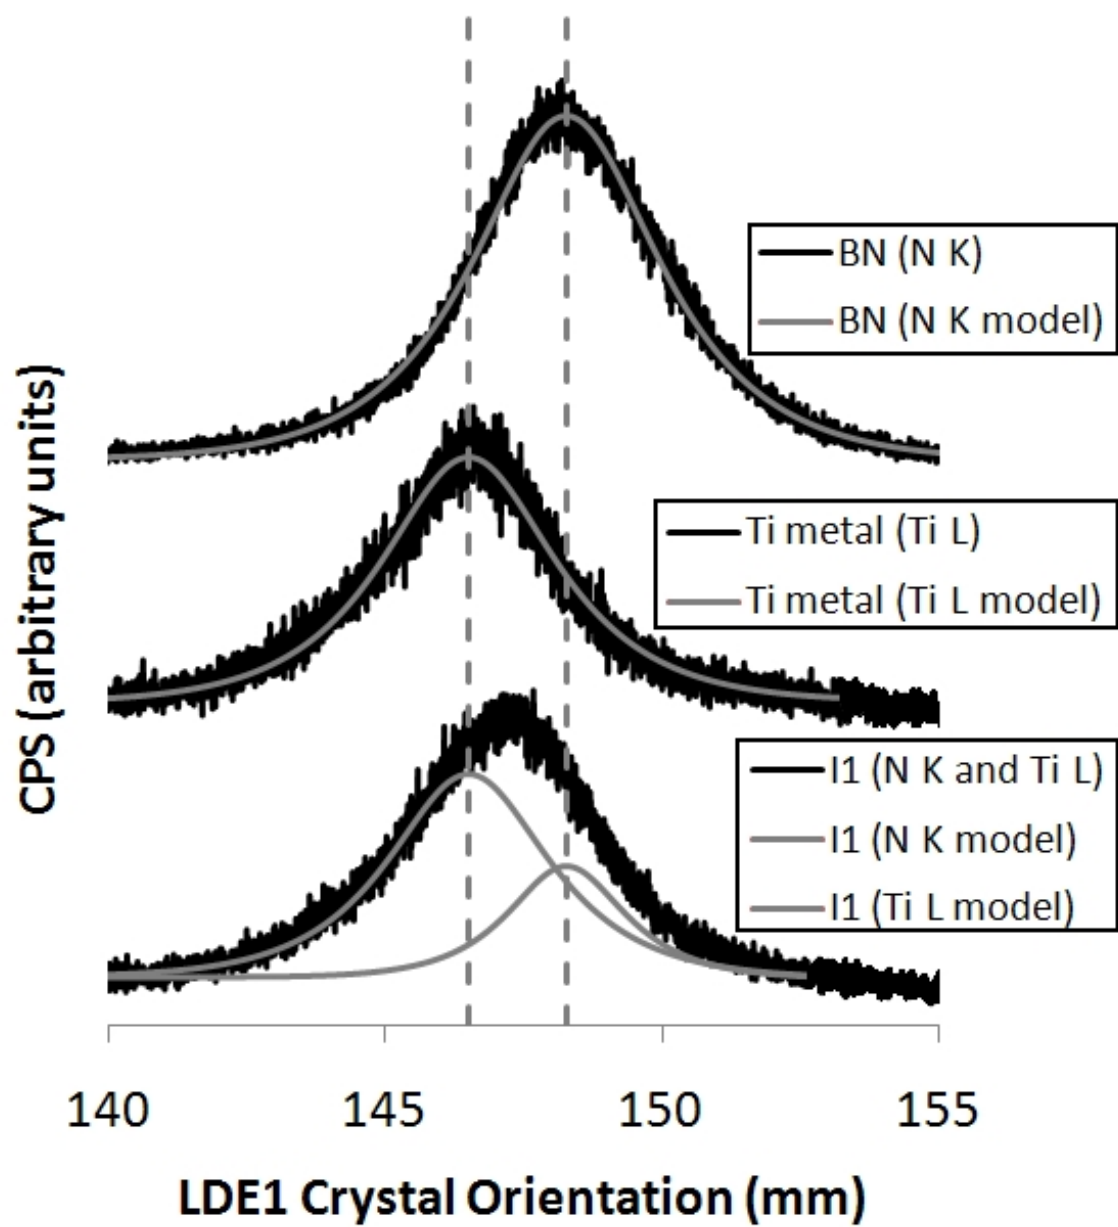

Supplement: b914117k-s1.pdf [file b914117k-s1.pdf]

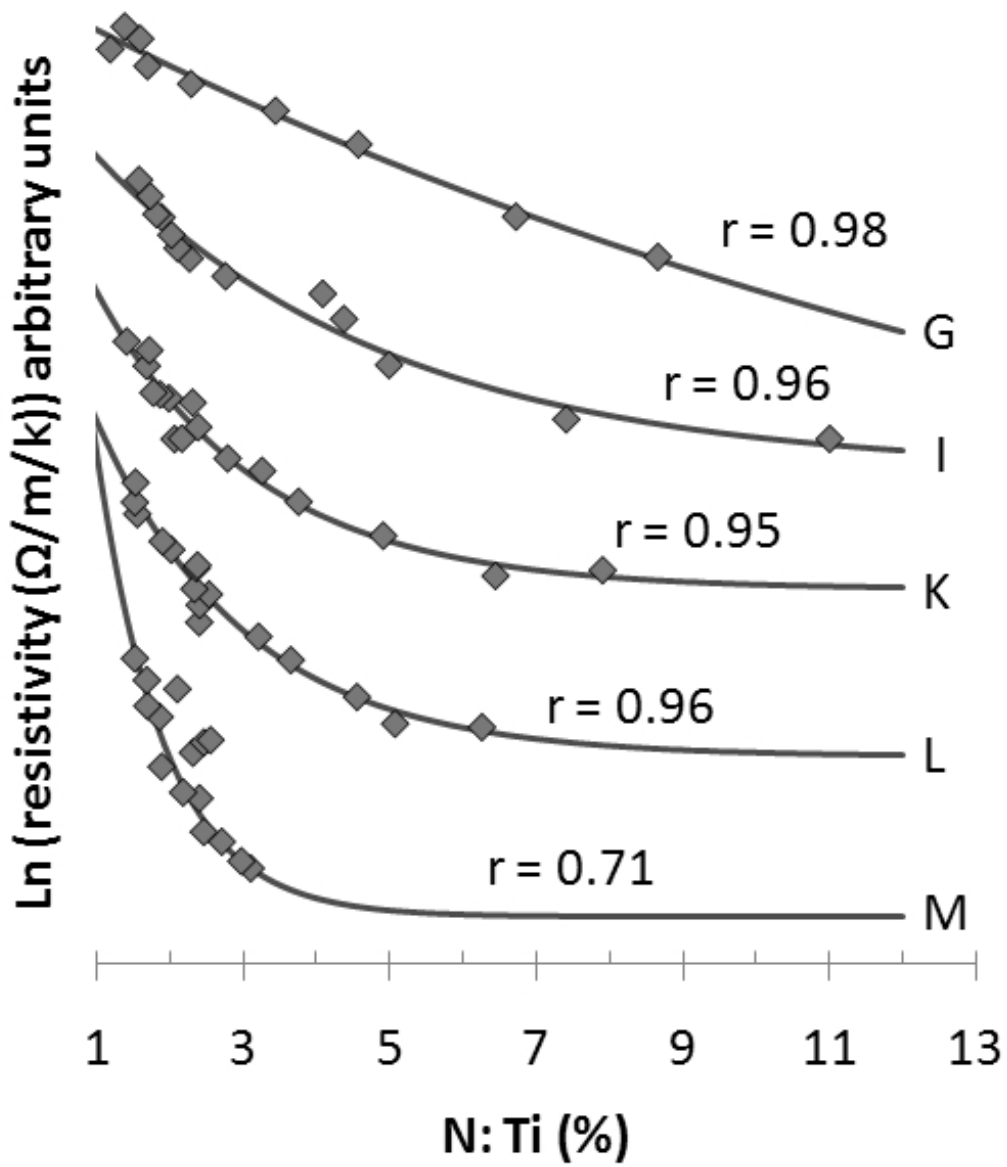

Supplement: b914117k-s2.pdf [file b914117k-s2.pdf]
